# Supplementary figures and images for: X-ray photochemistry of carbon hydride molecular ions
Source: Royal Society of Chemistry journal article supplement (doi:10.1039/c7cp08026c), 2018-01-01

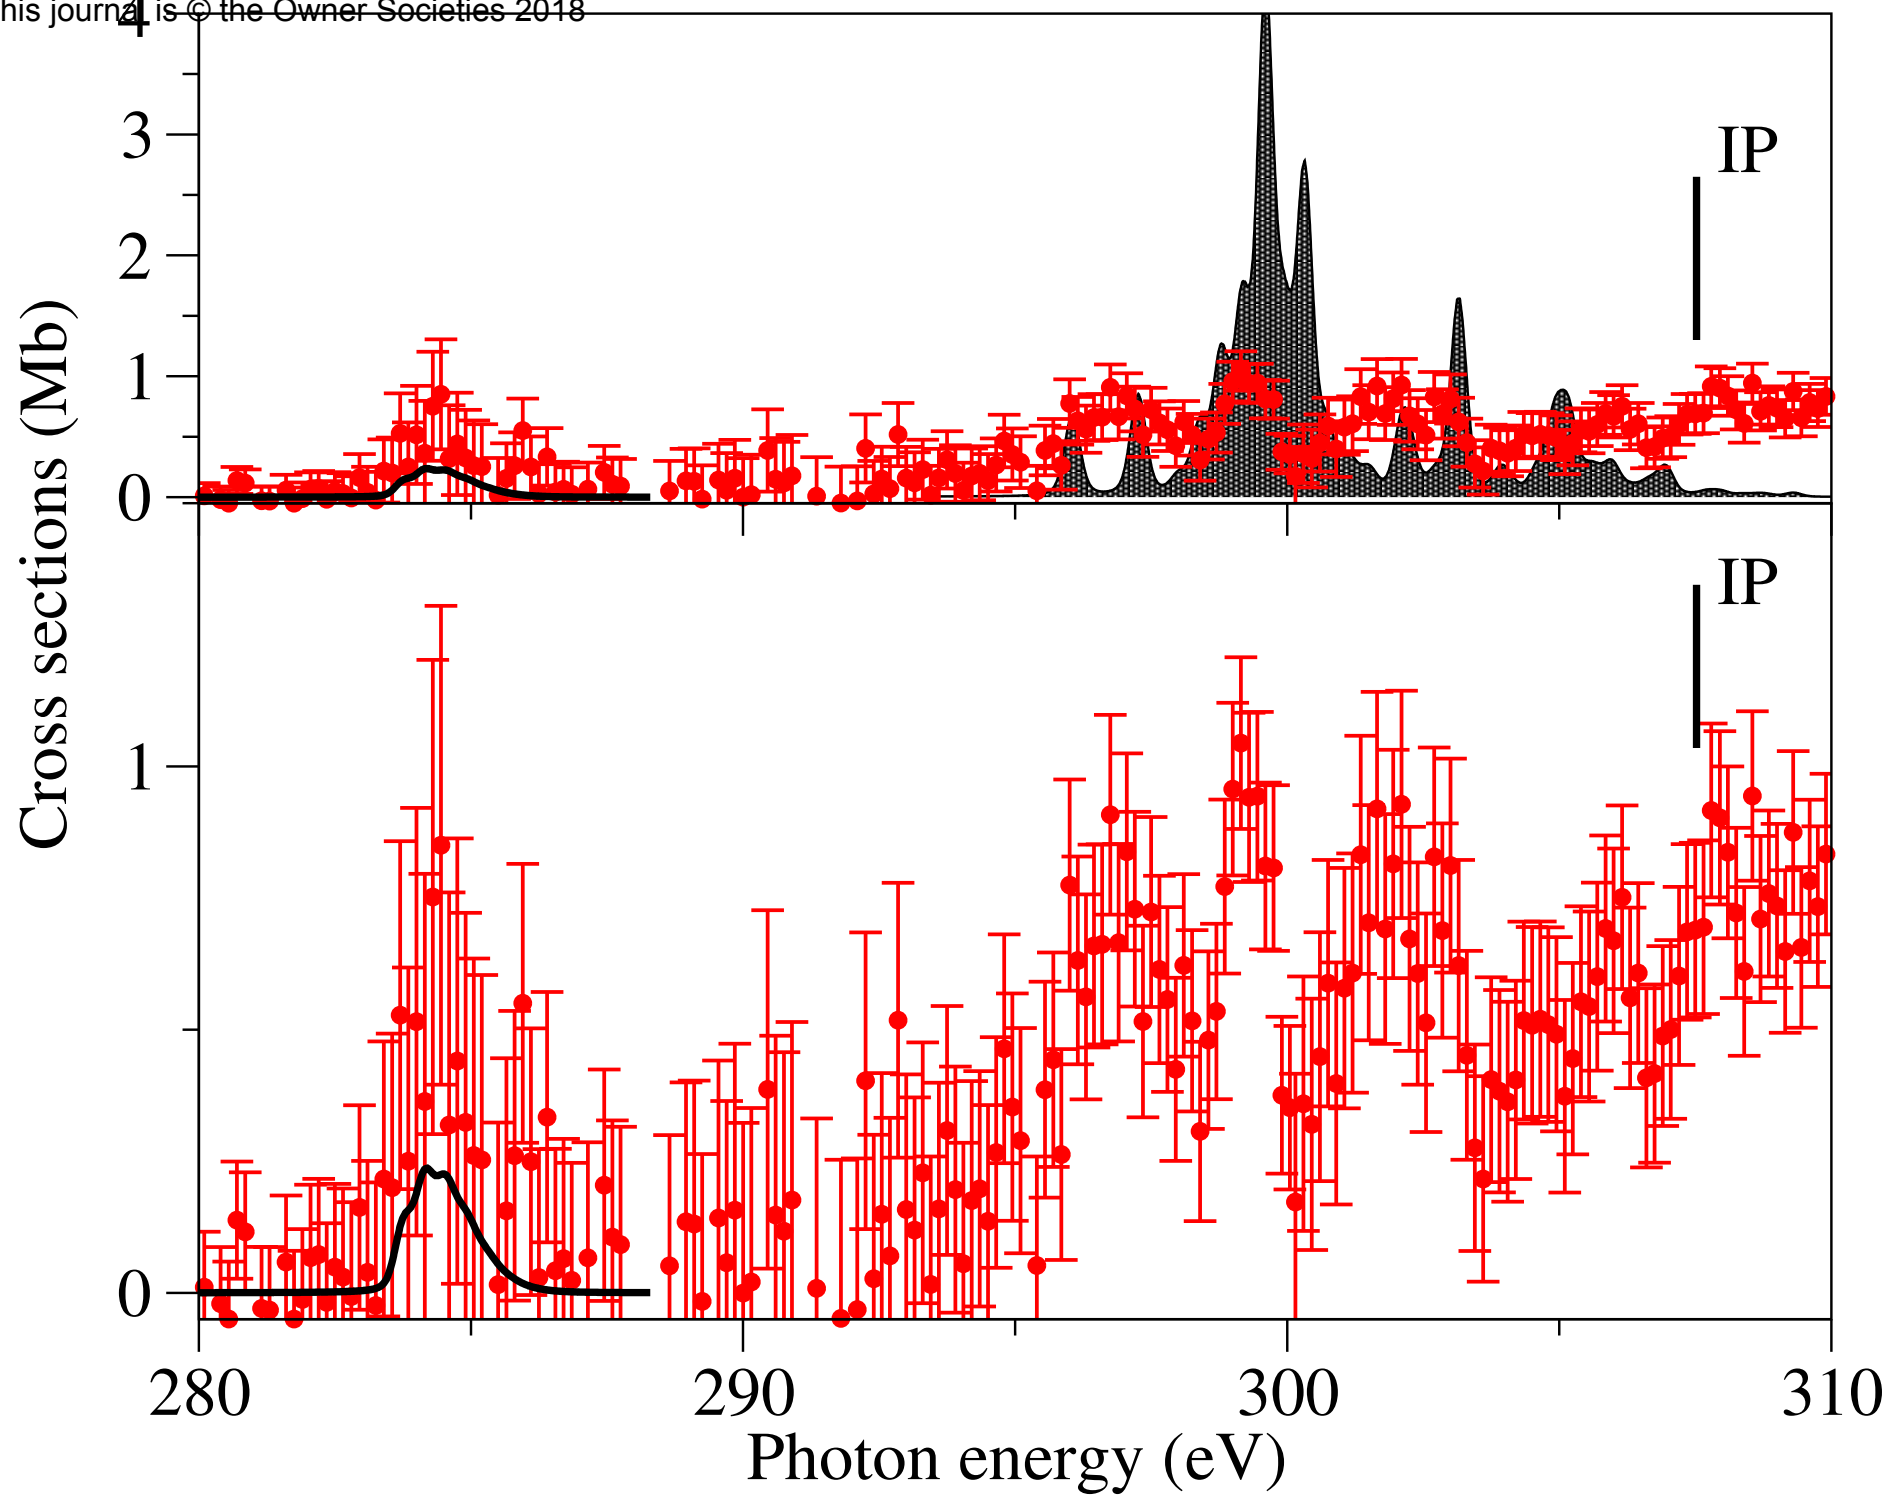

Supplement: c7cp08026c2.pdf [file c7cp08026c2.pdf]

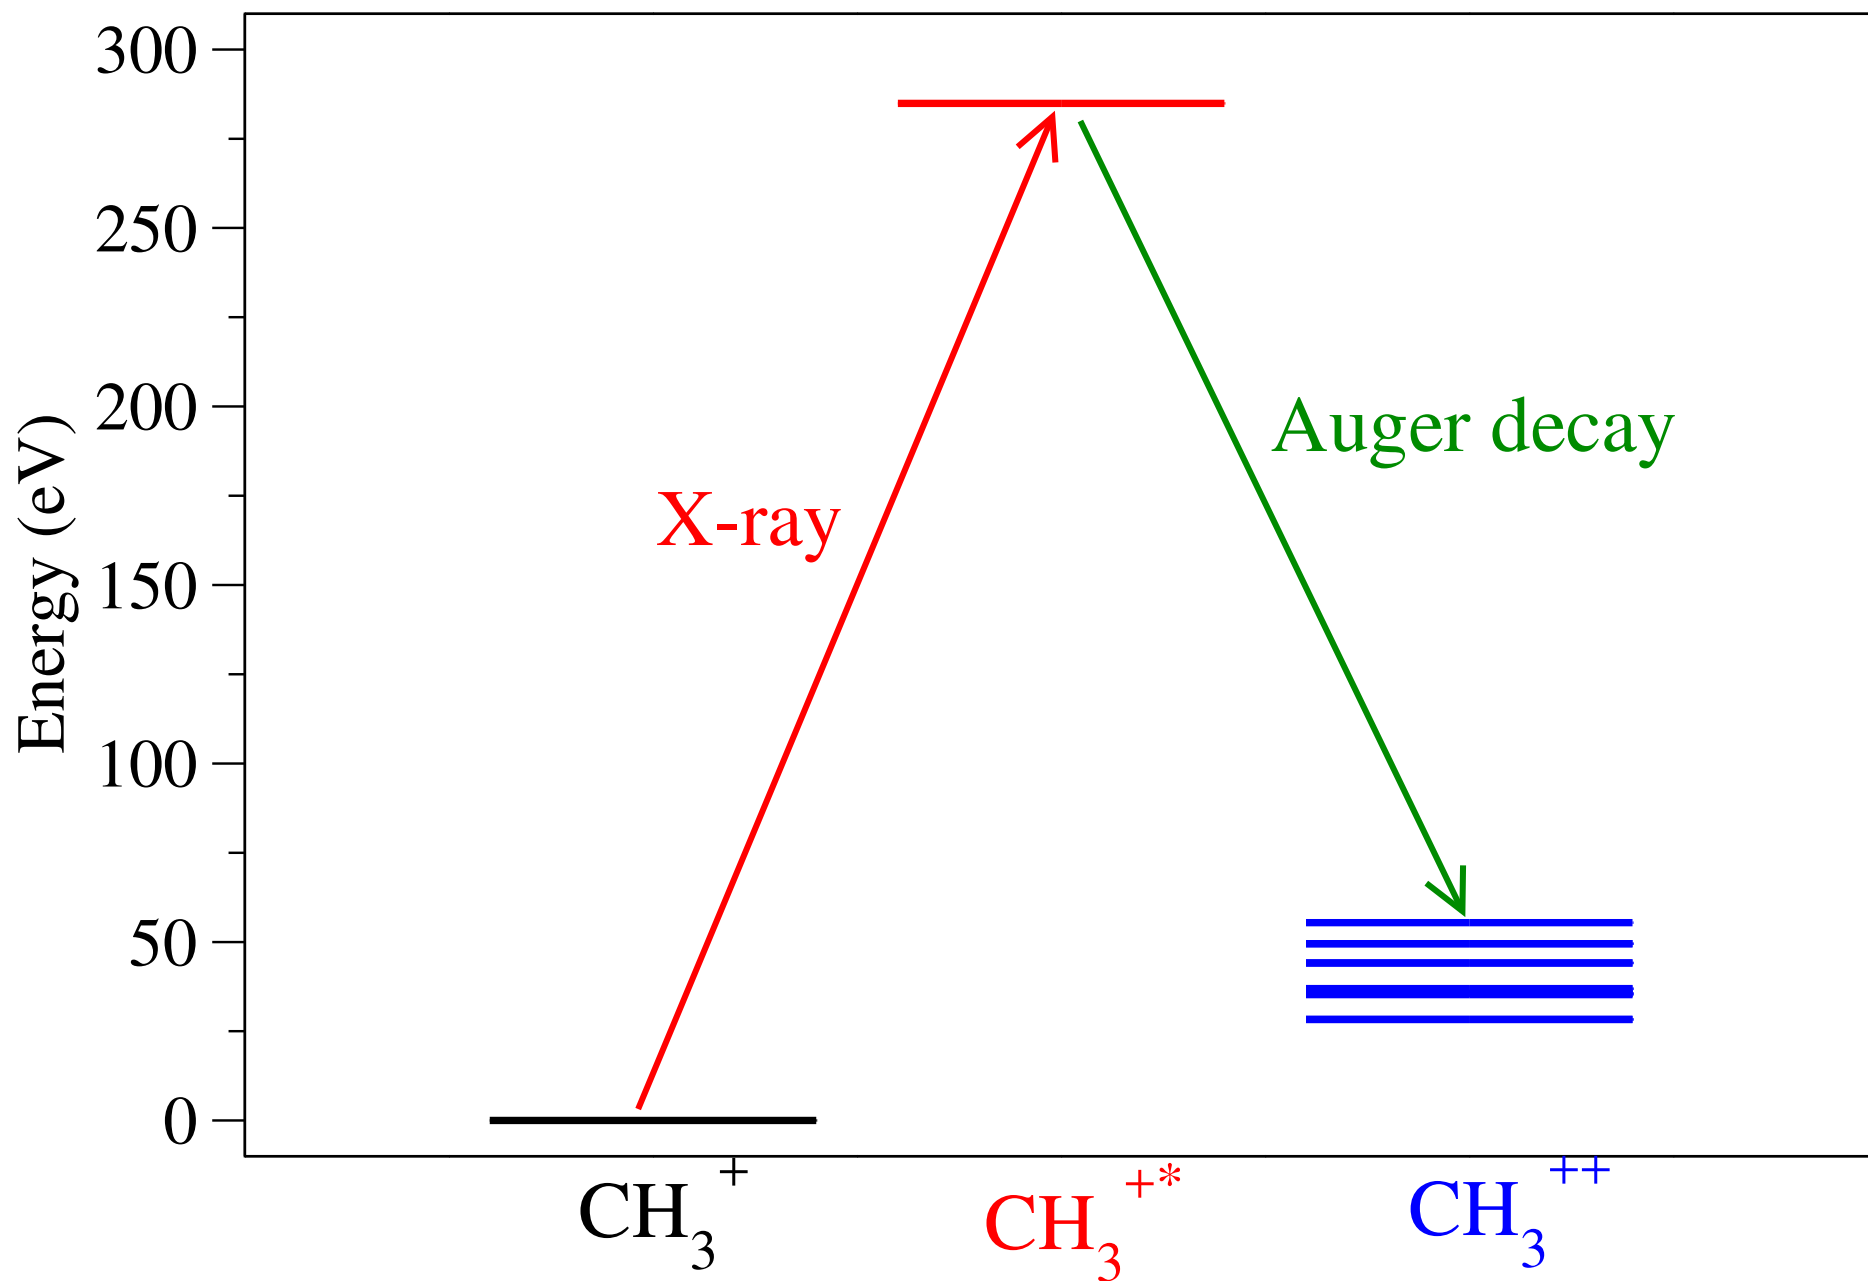

Supplement: c7cp08026c4.pdf [file c7cp08026c4.pdf]

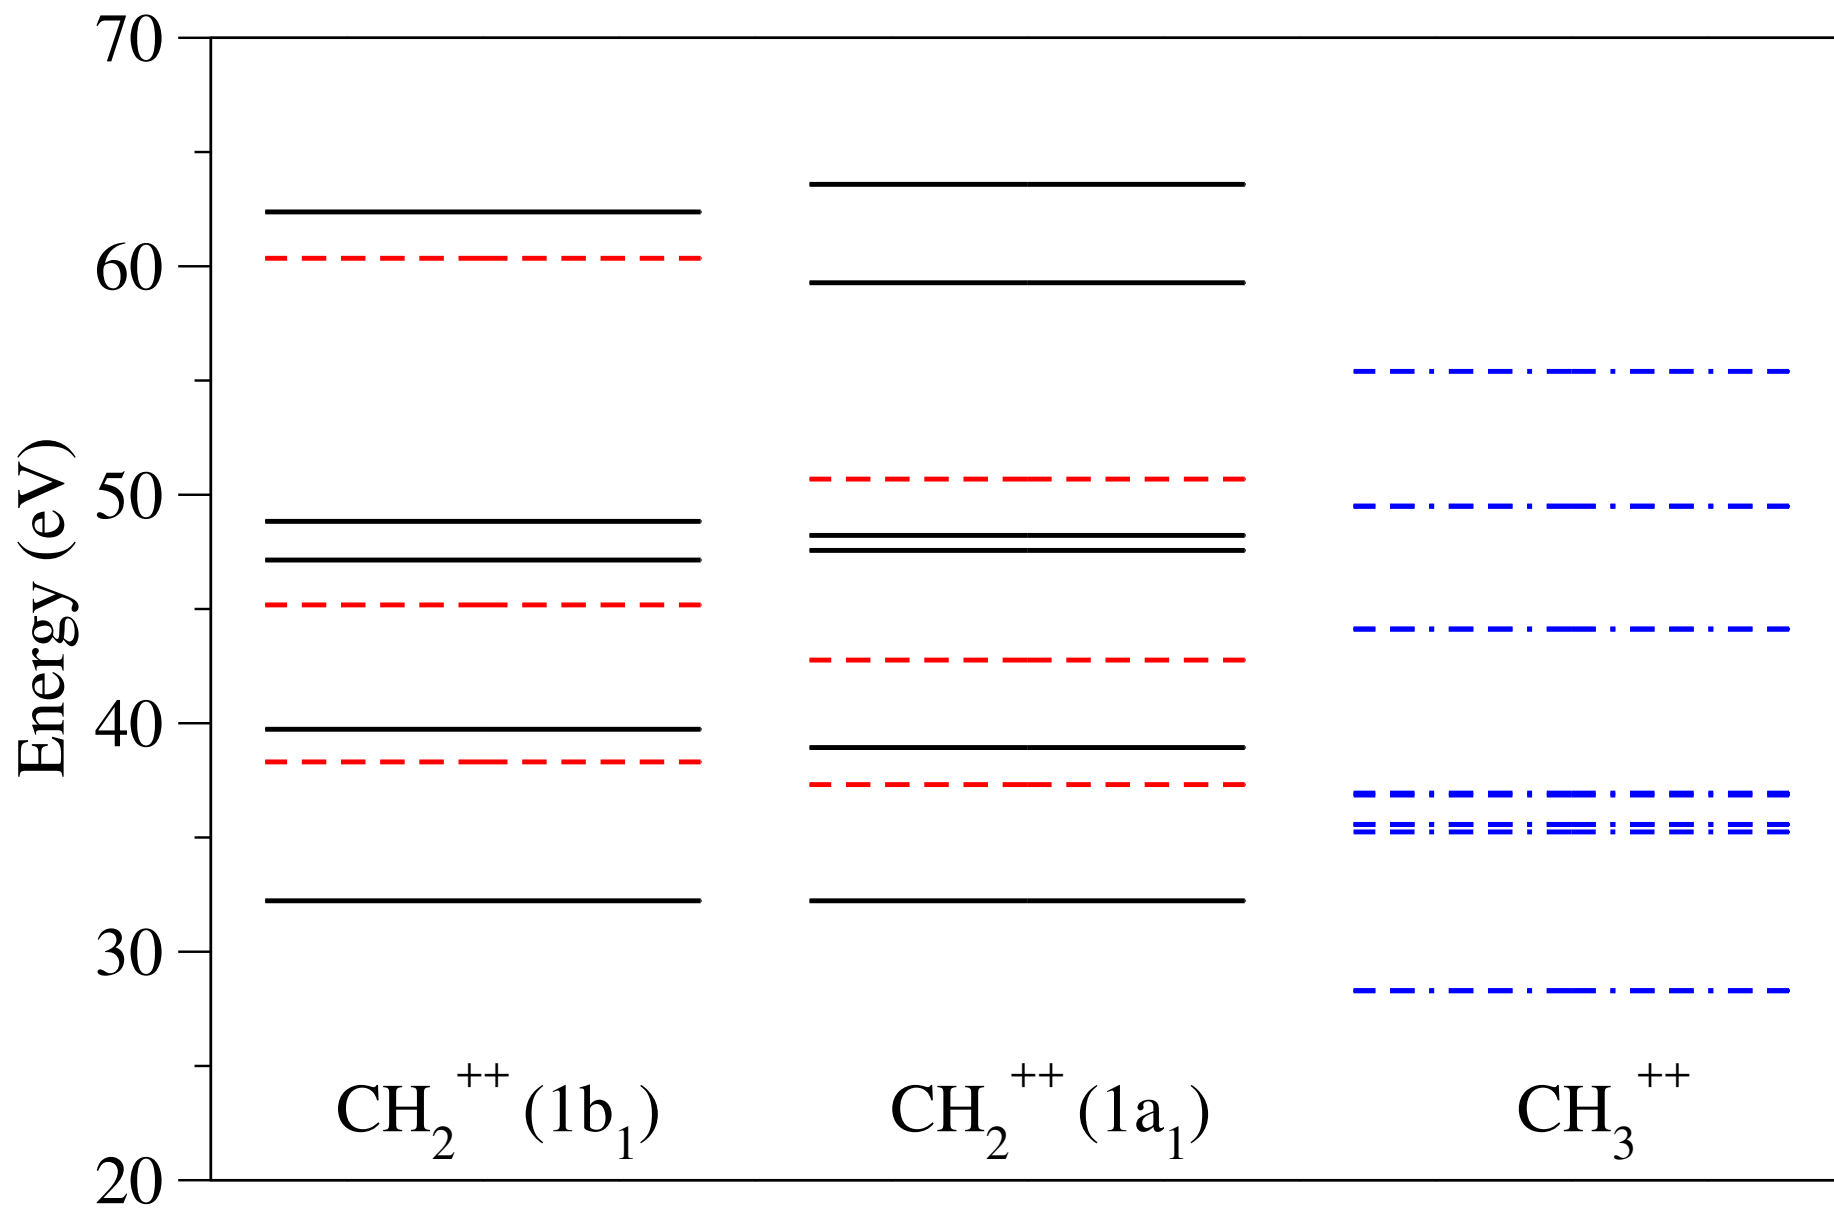

Supplement: c7cp08026c5.pdf [file c7cp08026c5.pdf]
